# Supplementary material for: Validation of CZECANCA (CZEch CAncer paNel for Clinical Application) for targeted NGS-based analysis of hereditary cancer syndromes
Source: PLoS One. 2018 Apr 12;13(4):e0195761. doi: 10.1371/journal.pone.0195761 (PMC5896995; doi:10.1371/journal.pone.0195761)
Supplement: S6 Table — (XLSX) [file pone.0195761.s006.xlsx]

## Sheet: S6
S6 Table. List of variants used for the validation of SNVs detection.
#	patient no	BRCA1/2 SNVs	Type	Quality	Coverage	Detected	Remark	Previous analytic approach (in previously missed variants)
1	1070	BRCA1:NM_007294:exon2:c.68_69del:p.23_23del	indel	770.73	57	yes
2	1190	BRCA1:NM_007294:exon3:c.C93G:p.I31M	SNV	2749.77	199	yes
3	111	BRCA1:NM_007294:exon4:c.T181G:p.C61G	SNV	2140.77	131	yes
4	623	BRCA1:NM_007294:exon4:c.T181G:p.C61G	SNV	1692.77	51	yes
5	709	BRCA1:NM_007294:exon4:c.T181G:p.C61G	SNV	2207.77	150	yes
6	923	BRCA1:NM_007294:exon4:c.T181G:p.C61G	SNV	1399.77	99	yes
7	1423	BRCA1:NM_007294:exon4:c.T181G:p.C61G	SNV	1574.77	116	yes
8	2108	BRCA1:NM_007294:exon4:c.T181G:p.C61G	SNV	1772.77	132	yes
9	2430	BRCA1:NM_007294:exon4:c.T181G:p.C61G	SNV	654.7	60	yes
10	2471	BRCA1:NM_007294:exon4:c.T181G:p.C61G	SNV	856.7	70	yes
11	881	BRCA1:NM_007294:exon6:c.213-12A>G	SNV	2077.77	139	yes
12	2519	BRCA1:NM_007294:exon6:c.213-12A>G	SNV	855.77	62	yes
13	361	BRCA1:NM_007294:exon10:c.1127delA:p.N376fs	indel	803.73	55	yes
14	554	BRCA1:NM_007294:exon10:c.C1687T:p.Q563X	SNV	1009.77	91	yes
15	956	BRCA1:NM_007294:exon10:c.C1687T:p.Q563X	SNV	1412.77	102	yes
16	961	BRCA1:NM_007294:exon10:c.C1687T:p.Q563X	SNV	1407.77	119	yes
17	1233	BRCA1:NM_007294:exon10:c.C1687T:p.Q563X	SNV	2638.77	194	yes
18	2225	BRCA1:NM_007294:exon10:c.C1687T:p.Q563X	SNV	2610.77	155	yes
19	2688	BRCA1:NM_007294:exon10:c.T1916A:p.L639X	SNV	1493.77	132	yes
20	2649	BRCA1:NM_007294:exon10:c.1954dupA:p.K652fs	indel	1084.73	103	yes
21	2053	BRCA1:NM_007294:exon10:c.2411_2412del:p.804_804del	indel	3370.73	149	yes
22	1933	BRCA1:NM_007294:exon10:c.3018_3021del:p.1006_1007del	indel	2357.73	101	yes
23	2310	BRCA1:NM_007294:exon10:c.3018_3021del:p.1006_1007del	indel	2596.73	95	yes
24	2320	BRCA1:NM_007294:exon10:c.3642_3643del:p.1214_1215del	indel	1564.73	99	yes
25	1984	BRCA1:NM_007294:exon10:c.3695_3699del:p.1232_1233del	indel	3678.73	130	yes
26	598	BRCA1:NM_007294:exon10:c.3700_3704del:p.1234_1235del	indel	2103.73	83	yes
27	1468	BRCA1:NM_007294:exon10:c.3700_3704del:p.1234_1235del	indel	2852.73	91	yes
28	514	BRCA1:NM_007294:exon10:c.3756_3759del:p.1252_1253del	indel	1115.73	61	yes
29	1866	BRCA1:NM_007294:exon10:c.3770_3771del:p.1257_1257del	indel	2792.73	143	yes
30	1280	BRCA1:NM_007294:exon10:c.4065_4068del:p.1355_1356del	indel	1722.73	70	yes
31	1135	BRCA1:NM_007294:exon12:c.4214delT:p.I1405fs	indel	1853.73	102	yes
32	435	BRCA1:NM_007294:exon14:c.C4539A:p.C1513X	SNV	389.77	55	yes
33	2406	BRCA1:NM_007294:exon15:c.C4689G:p.Y1563X	SNV	1062.8	94	yes
34	2167	BRCA1:NM_007294:exon19:c.5266dupC:p.Q1756fs	indel	1759.73	109	yes
35	15	BRCA1:NM_007294:exon19:c.5266dupC:p.Q1756fs	indel	974.73	72	yes
36	41	BRCA1:NM_007294:exon19:c.5266dupC:p.Q1756fs	indel	1388.73	91	yes
37	75	BRCA1:NM_007294:exon19:c.5266dupC:p.Q1756fs	indel	1256.73	102	yes
38	187	BRCA1:NM_007294:exon19:c.5266dupC:p.Q1756fs	indel	2011.73	135	yes
39	239	BRCA1:NM_007294:exon19:c.5266dupC:p.Q1756fs	indel	1414.73	97	yes
40	261	BRCA1:NM_007294:exon19:c.5266dupC:p.Q1756fs	indel	3241.73	167	yes
41	265	BRCA1:NM_007294:exon19:c.5266dupC:p.Q1756fs	indel	920.73	65	yes
42	273	BRCA1:NM_007294:exon19:c.5266dupC:p.Q1756fs	indel	1450.73	95	yes
43	304	BRCA1:NM_007294:exon19:c.5266dupC:p.Q1756fs	indel	1365.73	91	yes
44	342	BRCA1:NM_007294:exon19:c.5266dupC:p.Q1756fs	indel	599.73	50	yes
45	368	BRCA1:NM_007294:exon19:c.5266dupC:p.Q1756fs	indel	1990.73	136	yes
46	370	BRCA1:NM_007294:exon19:c.5266dupC:p.Q1756fs	indel	1923.73	105	yes
47	387	BRCA1:NM_007294:exon19:c.5266dupC:p.Q1756fs	indel	2093.73	126	yes
48	418	BRCA1:NM_007294:exon19:c.5266dupC:p.Q1756fs	indel	1408.73	102	yes
49	458	BRCA1:NM_007294:exon19:c.5266dupC:p.Q1756fs	indel	1384.73	102	yes
50	483	BRCA1:NM_007294:exon19:c.5266dupC:p.Q1756fs	indel	1269.73	74	yes
51	494	BRCA1:NM_007294:exon19:c.5266dupC:p.Q1756fs	indel	1329.73	75	yes
52	500	BRCA1:NM_007294:exon19:c.5266dupC:p.Q1756fs	indel	1661.73	106	yes
53	536	BRCA1:NM_007294:exon19:c.5266dupC:p.Q1756fs	indel	1167.73	104	yes
54	642	BRCA1:NM_007294:exon19:c.5266dupC:p.Q1756fs	indel	1665.73	105	yes
55	654	BRCA1:NM_007294:exon19:c.5266dupC:p.Q1756fs	indel	1472.73	90	yes
56	679	BRCA1:NM_007294:exon19:c.5266dupC:p.Q1756fs	indel	1763.73	102	yes
57	733	BRCA1:NM_007294:exon19:c.5266dupC:p.Q1756fs	indel	2068.73	111	yes
58	788	BRCA1:NM_007294:exon19:c.5266dupC:p.Q1756fs	indel	1418.73	89	yes
59	803	BRCA1:NM_007294:exon19:c.5266dupC:p.Q1756fs	indel	1765.73	133	yes
60	864	BRCA1:NM_007294:exon19:c.5266dupC:p.Q1756fs	indel	1772.73	112	yes
61	878	BRCA1:NM_007294:exon19:c.5266dupC:p.Q1756fs	indel	1104.73	84	yes
62	892	BRCA1:NM_007294:exon19:c.5266dupC:p.Q1756fs	indel	1524.73	114	yes
63	349	BRCA1:NM_007294:exon19:c.C5251T:p.R1751X	SNV	881.77	77	yes
64	2457	BRCA1:NM_007294:exon19:c.C5251T:p.R1751X	SNV	1244.77	117	yes
65	1471	BRCA2:NM_000059:exon10:c.986_987insC:p.R329fs	indel	879.73	108	yes
66	1073	BRCA2:NM_000059:exon10:c.C1414T:p.Q472X	SNV	1334.77	98	yes
67	3107	BRCA2:NM_000059:exon10:c.C1414T:p.Q472X	SNV	926.77	91	yes
68	721	BRCA2:NM_000059:exon11:c.C2517A:p.Y839X	SNV	2289.77	161	yes
69	2647	BRCA2:NM_000059:exon11:c.2806_2809del:p.936_937del	indel	1574.73	68	yes
70	279	BRCA2:NM_000059:exon11:c.A3076T:p.K1026X	SNV	1667.77	120	yes
71	742	BRCA2:NM_000059:exon11:c.3846_3847del:p.1282_1283del	indel	2637.73	120	yes
72	348	BRCA2:NM_000059:exon11:c.3939delC:p.Y1313X	indel	1272.73	93	yes
73	1966	BRCA2:NM_000059:exon11:c.4284dupT:p.F1428fs	indel	1243.77	92	yes
74	233	BRCA2:NM_000059:exon11:c.C5645A:p.S1882X	SNV	815.77	68	yes
75	995	BRCA2:NM_000059:exon11:c.C5645A:p.S1882X	SNV	1952.77	139	yes
76	584	BRCA2:NM_000059:exon11:c.C5645A:p.S1882X	SNV	1057.77	87	yes
77	67	BRCA2:NM_000059:exon11:c.5759dupT:p.V1920fs	indel	1874.73	170	yes
78	2081	BRCA2:NM_000059:exon11:c.5759dupT:p.V1920fs	indel	1374.73	116	yes
79	2045	BRCA2:NM_000059:exon11:c.6444dupT:p.S2148fs	indel	3000.73	154	yes
80	1318	BRCA2:NM_000059:exon11:c.6448_6449del:p.2150_2150del	indel	1334.73	96	yes
81	1457	BRCA2:NM_000059:exon11:c.6591_6592del:p.2197_2198del	indel	1858.77	105	yes
82	1028	BRCA2:NM_000059:exon11:c.6753dupT:p.H2251fs	indel	1487.73	111	yes
83	2410	BRCA2:NM_000059:exon14:c.7151_7152del:p.2384_2384del	indel	1261.2	98	yes
84	2485	BRCA2:NM_000059:exon17:c.7910_7914del:p.2637_2638del	indel	1549.73	50	yes
85	216	BRCA2:NM_000059:exon17:c.7913_7917del:p.2638_2639del	indel	3275.73	104	yes
86	2399	BRCA2:NM_000059:exon18:c.8039_8040del:p.2680_2680del	indel	1923.73	97	yes
87	587	BRCA2:NM_000059:exon18:c.G8149T:p.A2717S	SNV	1510.77	103	yes
88	1511	BRCA2:NM_000059:exon19:c.G8363A:p.W2788X	SNV	1035.77	93	yes
89	2386	BRCA2:NM_000059:exon19:c.A8486G:p.Q2829R	SNV	1345.77	104	yes
90	829	BRCA2:NM_000059:exon22:c.8755-1G>A	SNV	1353.77	92	yes
91	2221	BRCA2:NM_000059:exon25:c.A9371T:p.N3124I	SNV	776.77	78	yes
92	876	BRCA2:NM_000059:exon25:c.A9371T:p.N3124I	SNV	745.1	76	yes
93	1001	BRCA2:NM_000059:exon25:c.9402delC:p.G3134fs	indel	1775.73	115	yes
94	1464	BRCA2:NM_000059:exon25:c.9402delC:p.G3134fs	indel	1697.73	106	yes
1	297	BRCA2:NM_000059:exon2:c.G3A:p.M1I	SNV	710.77	53	yes	newly identified	PTT
2	457	BRCA1:NM_007294:exon6:c.213-12A>G	SNV	384.77	32	yes	newly identified	cDNA-based sequencing
3	626	BRCA1:NM_007294:exon6:c.213-12A>G	SNV	1103.77	79	yes	newly identified	cDNA-based sequencing
4	1371	BRCA1:NM_007294:exon7:c.C505T:p.Q169X	SNV	947.77	98	yes	newly identified	cDNA-based sequencing
5	1850	BRCA1:NM_007294:exon10:c.694delG:p.Asp232Met fs*1	indel	1046.73	59	yes	newly identified	cDNA-based sequencing
6	456	BRCA1:NM_007294:exon14:c.4484+1G>T	SNV	744.77	59	yes	newly identified	cDNA-based sequencing
7	991	BRCA1:NM_007294:exon16:c.4676-1G>A	SNV	1232.77	94	yes	newly identified	cDNA-based sequencing
8	334	BRCA2:NM_000059:exon8:c.657_658del:p.219_220del	indel	1126.73	76	yes	newly identified	cDNA-based sequencing
9	304	BRCA2:NM_000059:exon11:c.C5645A:p.S1882X	SNV	1500.77	129	yes	newly identified	BRCA1-positive; BRCA2 was not analyzed
	patient no	non-BRCA1/2 SNVs
1	2708	ATM:NM_000051:exon10:c.1449_1450del:p.483_484del	indel	1617.73	85	yes
2	2927	ATM:NM_000051:exon38:c.5712dupA:p.K1904fs	indel	957.73	99	yes
3	116	ATM:NM_000051:exon40:c.G5932T:p.E1978X	SNV	867.77	58	yes
4	2970	ATM:NM_000051:exon40:c.G5932T:p.E1978X	SNV	974.77	74	yes
5	1135	ATM:NM_000051:exon52:c.7630-2A>C	SNV	1872.77	125	yes
6	2896	ATM:NM_000051:exon52:c.7630-2A>C	SNV	704.77	62	yes
7	1753	ATM:NM_000051:exon63:c.C9148T:p.P3050S	SNV	1094.77	103	yes
8	149	DPYD:NM_000110:exon15:c.1905+1G>A	SNV	1525.77	123	yes
9	599	DPYD:NM_000110:exon15:c.1905+1G>A	SNV	465.77	34	yes
10	1135	DPYD:NM_000110:exon15:c.1905+1G>A	SNV	1665.77	110	yes
11	2189	CHEK2:NM_007194:exon2:c.100_101del:p.34_34del	indel	1338.77	83	yes
12	2542	CHEK2:NM_007194:exon2:c.277delT:p.W93fs	indel	1351.73	82	yes
13	2637	CHEK2:NM_007194:exon2:c.277delT:p.W93fs	indel	1402.77	104	yes
14	1538	CHEK2:NM_007194:exon7:c.846+4_+7del4:p.282	indel	522.73	36	yes
15	2257	CHEK2:NM_007194:exon11:c.1100delC:p.T367fs	indel	883.73	65	yes
16	2584	CHEK2:NM_007194:exon11:c.1100delC:p.T367fs	indel	923.77	94	yes
17	59	NBN:NM_002485:exon2:c.37+1G>A	SNV	668.77	45	yes
18	639	NBN:NM_002485:exon3:c.188delT:p.I63fs	indel	1374.73	75	yes
19	145	NBN:NM_002485:exon6:c.657_661del:p.219_221del	indel	2525.73	105	yes
20	1233	NBN:NM_002485:exon6:c.657_661del:p.219_221del	indel	5070.73	183	yes
21	319	NBN:NM_002485:exon7:c.585-4A>G	SNV	1429.77	89	yes
22	2404	PALB2:NM_024675:exon3:c.172_175del:p.58_59del	indel	1498.73	47	yes
23	2510	PALB2:NM_024675:exon4:c.A241T:p.K81X	SNV	826.77	53	yes
24	2714	PALB2:NM_024675:exon4:c.508_509del:p.170_170del	indel	1562.73	78	yes
25	2727	PALB2:NM_024675:exon4:c.508_509del:p.170_170del	indel	1251.77	135	yes
26	2990	PALB2:NM_024675:exon4:c.509_510del:p.170_170del	indel	2861.73	143	yes
27	2915	PALB2:NM_024675:exon4:c.653delA:p.E218fs	indel	1377.73	85	yes
28	1260	PALB2:NM_024675:exon4:c.901_907del:p.301_303del	indel	6712.73	146	yes
29	2844	PALB2:NM_024675:exon4:c.901_907del:p.301_303del	indel	433.77	41	yes
30	2664	PALB2:NM_024675:exon12:c.C3256T:p.R1086X	SNV	941.77	83	yes
31	2915	PPM1D:NM_003620:exon6:c.1386_1387del:p.462_463del	indel	1028.73	72	yes
32	1897	PPM1D:NM_003620:exon6:c.C1403G:p.S468X	SNV	224.77	81	yes
33	2480	PPM1D:NM_003620:exon6:c.1449dupT:p.T483fs	indel	1480.77	106	yes
34	3094	PPM1D:NM_003620:exon6:c.C1528T:p.Q510X	SNV	118.77	101	yes
35	1822	PPM1D:NM_003620:exon6:c.1607delG:p.R536fs	indel	466.73	108	yes
36	1804	PPM1D:NM_003620:exon6:c.A1645T:p.K549X	SNV	115.77	86	yes
37	218	RAD51C:NM_002876:exon2:c.379_380insG:p.P127fs	indel	1818.73	120	yes
38	800	RAD51C:NM_058216:exon3:c.A502T:p.R168X	SNV	1737.77	113	yes
39	2740	RAD51C:NM_058216:exon3:c.A502T:p.R168X	SNV	684.77	68	yes
40	2983	RAD51C:NM_058216:exon3:c.A502T:p.R168X	SNV	834.77	42	yes
41	142	RAD51D:NM_002878:exon8:c.C694T:p.R232X	SNV	1597.77	113	yes
42	2115	RAD51D:NM_002878:exon8:c.C694T:p.R232X	SNV	1178.77	82	yes
43	1450	TP53:NM_000546:exon7:c.A760G:p.I254V	SNV	1907.77	167	yes
