# Supplementary material for: Validation of CZECANCA (CZEch CAncer paNel for Clinical Application) for targeted NGS-based analysis of hereditary cancer syndromes
Source: PLoS One. 2018 Apr 12;13(4):e0195761. doi: 10.1371/journal.pone.0195761 (PMC5896995; doi:10.1371/journal.pone.0195761)
Supplement: S8 Table — The numbers of samples with previously characterized CNVs are highlighted in red. The table show raw values obtained from CNVkit as well as median-normalized values. The normalized values >0.5 (highlighted in green) were indicative for the presence of a duplication, while values <-0.6 (highlighted in yellow) were indicative for a deletion. Data from this table were used for creation of Fig 5. (XLSX) [file pone.0195761.s008.xlsx]

## Sheet: S8
S8 Table. CNV scores (from CNVkit software) of bins in BRCA1, PALB2, CHEK2, and TP53. The numbers of samples with previously characterized CNVs are highlighted in red. The table show raw values obtained from CNVkit as well as median-normalized values. The normalized values >0.5 (highlighted in green) were indicative for the presence of a duplication, while values <-0.6 (highlighted in yellow) wer…
BRCA1	Exon	coordinate	raw CNVkit values																median (of raw CNVkit values)	median-normalized CNVkit values (= raw value - median value)
Sample numbers:			2890	3042	CZ388	CZ389	CZ492	CZ506	CZ515	1388	779	2900	2764	1190	102	2678	3321	CZ375		2890	3042	CZ388	CZ389	CZ492	CZ506	CZ515	1388	779	2900	2764	1190	102	2678	3321	CZ375
	1	chr17_41278199_41278474	-0.023303	0.0651612	0.0783453	0.0131927	0.00656843	-0.00124025	0.160148	0.109946	-0.889147	-0.091598	-0.110518	0.201124	0.0561275	0.154125	-0.964524	0.135493	0.0346601	-0.0579631	0.0305011	0.0436852	-0.0214674	-0.0280917	-0.0359003	0.125488	0.0752859	-0.923807	-0.126258	-0.145178	0.166464	0.0214674	0.119465	-0.999184	0.100833
	1	chr17_41277925_41278199	0.187756	0.217241	0.336117	0.2134	0.231519	0.222888	0.23947	0.298686	-0.580047	0.383928	0.283005	0.27692	0.28401	0.347545	-0.700154	0.443252	0.258195	-0.070439	-0.040954	0.077922	-0.044795	-0.026676	-0.035307	-0.018725	0.040491	-0.838242	0.125733	0.02481	0.018725	0.025815	0.08935	-0.958349	0.185057
	1	chr17_41277650_41277925	-0.0176921	0.24356	0.183941	0.18406	0.06777	0.338534	0.339501	0.357721	-0.419588	0.47488	0.276518	0.249857	0.230922	0.308496	-0.868503	0.538667	0.246708	-0.264401	-0.0031485	-0.0627675	-0.0626485	-0.178939	0.0918255	0.0927925	0.111013	-0.666297	0.228172	0.0298095	0.0031485	-0.0157865	0.0617875	-1.11521	0.291959
	1	chr17_41277376_41277650	0.179579	0.125229	0.12167	0.313791	0.266733	0.328368	0.257961	0.250803	-0.476026	0.404764	0.274236	0.218353	0.199267	0.200939	-0.808178	0.276459	0.234578	-0.054999	-0.109349	-0.112908	0.079213	0.032155	0.09379	0.023383	0.016225	-0.710604	0.170186	0.039658	-0.016225	-0.035311	-0.033639	-1.04276	0.041881
	1	chr17_41277101_41277376	0.143057	0.0657363	0.0344458	0.0307207	-0.123464	0.0343008	0.0157146	0.126966	-0.885741	0.0987964	0.0262632	-0.0158792	0.0844193	-0.0242143	-1.29928	0.129213	0.0325107	0.110546	0.0332255	0.00193505	-0.00179005	-0.155975	0.00179005	-0.0167961	0.0944552	-0.918252	0.0662857	-0.00624755	-0.04839	0.0519086	-0.056725	-1.33179	0.0967022
	1	chr17_41276827_41277101	-0.354074	-0.513371	-0.402523	-0.658504	-0.359642	-0.502981	-0.333605	-0.371822	-1.38141	-0.412151	-0.597169	-0.61288	-0.274751	-0.403744	-1.52593	-0.477827	-0.444989	0.090915	-0.068382	0.042466	-0.213515	0.085347	-0.057992	0.111384	0.073167	-0.936421	0.032838	-0.15218	-0.167891	0.170238	0.041245	-1.08094	-0.032838
	1	chr17_41276552_41276827	0.0610204	-0.210347	0.0314322	-0.0579653	-0.0466676	-0.236084	0.171844	-0.00384283	-1.0733	0.00591183	-0.060729	-0.0382309	-0.0759115	0.0872712	-1.06811	-0.0569468	-0.0518072	0.112828	-0.15854	0.0832394	-0.0061581	0.0051396	-0.184277	0.223651	0.0479644	-1.02149	0.057719	-0.0089218	0.0135763	-0.0241043	0.139078	-1.0163	-0.0051396
	1	chr17_41276278_41276552	0.397028	0.240315	0.265627	0.293586	0.18893	0.357746	0.419977	0.357655	-0.671276	0.408132	0.429762	0.402504	0.204391	0.291862	-0.861062	0.467464	0.32562	0.0714075	-0.0853055	-0.0599935	-0.0320345	-0.13669	0.0321255	0.0943565	0.0320345	-0.996896	0.0825115	0.104141	0.0768835	-0.121229	-0.0337585	-1.18668	0.141844
	2	chr17_41276023_41276142	-0.38424	-0.235438	-0.490429	-0.300895	-0.450234	-0.348564	-0.324341	-0.0349064	-1.12195	-0.150828	-0.594691	-0.41735	-0.453224	-0.504055	-1.43139	-0.12491	-0.400795	0.016555	0.165357	-0.089634	0.0999	-0.049439	0.052231	0.076454	0.365889	-0.721155	0.249967	-0.193896	-0.016555	-0.052429	-0.10326	-1.03059	0.275885
	3	chr17_41267719_41267819	-0.0495949	0.0396166	-0.074862	-0.169466	-0.21089	-0.362432	0.173649	-0.139227	-0.0349855	-0.0661221	-0.247369	-0.207139	-0.185629	-0.0671144	-0.905768	-0.0536933	-0.107044	0.0574496	0.146661	0.0321825	-0.0624215	-0.103846	-0.255387	0.280693	-0.0321825	0.072059	0.0409224	-0.140325	-0.100095	-0.0785845	0.0399301	-0.798724	0.0533512
	5	chr17_41258461_41258561	-0.105932	0.089613	0.210186	-0.0693412	0.0813746	0.0152698	0.00503302	0.0284052	-0.376729	0.0177617	-1.25917	-0.978545	0.21928	-0.255702	-1.18613	-0.901554	-0.0321541	-0.0737779	0.121767	0.24234	-0.0371871	0.113529	0.0474239	0.0371871	0.0605593	-0.344575	0.0499158	-1.22702	-0.946391	0.251434	-0.223548	-1.15398	-0.8694
	6	chr17_41256874_41256983	0.28846	0.0025301	-0.0388999	0.274748	0.200655	-0.0384359	-0.0165701	0.147374	0.0734816	0.0840044	-1.05239	-0.800045	0.0567012	0.0789866	-0.771428	-0.808585	0.0296157	0.258844	-0.0270855	-0.0685156	0.245132	0.171039	-0.0680516	-0.0461857	0.117758	0.0438659	0.0543888	-1.08201	-0.829661	0.0270855	0.049371	-0.801044	-0.838201
	7	chr17_41256128_41256288	0.0134726	0.0219927	0.122661	0.055922	0.176305	-0.340799	-0.0238347	0.137617	-0.0119929	0.115163	-0.692101	-0.625546	0.10576	-0.0137296	-1.0385	-1.05288	0.00073985	0.0127327	0.0212529	0.121921	0.0551821	0.175565	-0.341539	-0.0245746	0.136877	-0.0127328	0.114423	-0.692841	-0.626286	0.10502	-0.0144695	-1.03924	-1.05362
	8	chr17_41251781_41251907	-0.109738	0.0867271	0.0317411	0.0346251	0.0482707	0.0363512	0.135474	0.0441084	0.262869	0.292053	-0.801394	-0.837606	0.11469	0.104689	-1.06395	-0.753239	0.0402298	-0.149968	0.0464973	-0.0084887	-0.0056047	0.0080409	-0.0038786	0.0952442	0.0038786	0.222639	0.251823	-0.841624	-0.877836	0.0744602	0.0644592	-1.10418	-0.793469
	9	chr17_41249233_41249333	-0.146383	-0.137693	-0.114434	0.0442715	-0.0833659	-0.280786	0.0940928	-0.0205493	0.0335121	-0.00722837	-0.0186086	-0.889993	0.137272	-0.134929	-0.76717	-1.01333	-0.0989	-0.0474831	-0.0387931	-0.015534	0.143171	0.015534	-0.181886	0.192993	0.0783506	0.132412	0.0916716	0.0802913	-0.791093	0.236172	-0.036029	-0.66827	-0.91443
	10	chr17_41247851_41247951	-0.0249014	0.0666113	0.0512571	-0.0728984	-0.129568	-0.00944424	0.123033	0.0943017	0.225566	0.0759511	0.113857	-0.73802	-0.0394626	-0.143961	-0.628793	-1.01838	-0.0171728	-0.00772858	0.0837841	0.0684299	-0.0557256	-0.112395	0.00772858	0.140206	0.111475	0.242739	0.0931239	0.13103	-0.720847	-0.0222898	-0.126788	-0.61162	-1.00121
	11	chr17_41246621_41246887	0.170744	0.340271	0.353056	0.2475	0.332231	0.391788	0.25065	0.330741	0.252223	0.160044	0.323971	0.240285	0.270588	0.233527	-0.60489	-0.625195	0.251436	-0.0806925	0.0888345	0.10162	-0.0039365	0.0807945	0.140352	-0.0007865	0.0793045	0.0007865	-0.0913925	0.0725345	-0.0111515	0.0191515	-0.0179095	-0.856326	-0.876631
	11	chr17_41246356_41246621	0.297661	0.463884	0.464992	0.277866	0.415285	0.491454	0.412283	0.408122	0.273414	0.199664	0.297483	0.234777	0.381778	0.230252	-0.613153	-0.628324	0.297572	8.9e-05	0.166312	0.16742	-0.019706	0.117713	0.193882	0.114711	0.11055	-0.024158	-0.097908	-8.9e-05	-0.062795	0.084206	-0.06732	-0.910725	-0.925896
	11	chr17_41246091_41246356	0.425374	0.339012	0.455012	0.342686	0.468189	0.488792	0.490977	0.4254	0.398939	0.422805	0.394297	0.183033	0.3845	0.228258	-0.61678	-0.665764	0.396618	0.028756	-0.057606	0.058394	-0.053932	0.071571	0.092174	0.094359	0.028782	0.002321	0.026187	-0.002321	-0.213585	-0.012118	-0.16836	-1.0134	-1.06238
	11	chr17_41245826_41246091	0.490901	0.449277	0.478129	0.468438	0.392838	0.482272	0.428016	0.448245	0.516213	0.465862	0.495662	0.470992	0.34683	0.440653	-0.507137	-0.688368	0.457569	0.0333315	-0.0082925	0.0205595	0.0108685	-0.0647315	0.0247025	-0.0295535	-0.0093245	0.0586435	0.0082925	0.0380925	0.0134225	-0.110739	-0.0169165	-0.964706	-1.14594
	11	chr17_41245561_41245826	0.532844	0.423384	0.423615	0.429122	0.367448	0.463627	0.403454	0.427706	0.456439	0.468295	0.497289	0.385052	0.480655	0.596173	-0.567437	-0.215224	0.428414	0.10443	-0.00503	-0.004799	0.000708	-0.060966	0.035213	-0.02496	-0.000708	0.028025	0.039881	0.068875	-0.043362	0.052241	0.167759	-0.995851	-0.643638
	11	chr17_41245296_41245561	0.47893	0.544126	0.437514	0.470535	0.494397	0.50565	0.511229	0.439023	0.545026	0.552948	0.47226	0.403242	0.344449	0.449795	-0.621143	-0.280181	0.471398	0.0075325	0.0727285	-0.0338835	-0.0008625	0.0229995	0.0342525	0.0398315	-0.0323745	0.0736285	0.0815505	0.0008625	-0.0681555	-0.126949	-0.0216025	-1.09254	-0.751579
	11	chr17_41245031_41245296	0.468369	0.403802	0.381847	0.366171	0.535915	0.434934	0.534735	0.41916	0.505134	0.610335	0.37248	0.423876	0.35915	0.555249	-0.454682	-0.440508	0.421518	0.046851	-0.017716	-0.039671	-0.055347	0.114397	0.013416	0.113217	-0.002358	0.083616	0.188817	-0.049038	0.002358	-0.062368	0.133731	-0.8762	-0.862026
	11	chr17_41244766_41245031	0.393388	0.501624	0.484561	0.430588	0.493745	0.573592	0.501265	0.509933	0.606884	0.573489	0.375158	0.449175	0.44796	0.471531	-0.370851	-0.527281	0.478046	-0.084658	0.023578	0.006515	-0.047458	0.015699	0.095546	0.023219	0.031887	0.128838	0.095443	-0.102888	-0.028871	-0.030086	-0.006515	-0.848897	-1.00533
	11	chr17_41244501_41244766	0.463381	0.596782	0.513589	0.442902	0.496025	0.463627	0.412507	0.694158	0.469157	0.517595	0.426633	0.464256	0.377715	0.461228	-0.391434	-0.411584	0.463504	-0.000123	0.133278	0.050085	-0.020602	0.032521	0.000123	-0.050997	0.230654	0.005653	0.054091	-0.036871	0.000752	-0.085789	-0.002276	-0.854938	-0.875088
	11	chr17_41244236_41244501	0.602419	0.432672	0.526581	0.605445	0.554428	0.571417	0.481723	0.680595	0.47419	0.616573	0.388109	0.532934	0.3129	0.617799	-0.547056	-0.396487	0.529757	0.0726615	-0.0970855	-0.0031765	0.0756875	0.0246705	0.0416595	-0.0480345	0.150837	-0.0555675	0.0868155	-0.141649	0.0031765	-0.216857	0.0880415	-1.07681	-0.926244
	11	chr17_41243971_41244236	0.502736	0.415716	0.430485	0.513074	0.48548	0.505295	0.476048	0.277441	0.487406	0.620598	0.410656	0.362964	0.240603	0.41906	-0.692147	-0.548744	0.424772	0.0779635	-0.0090565	0.0057125	0.0883015	0.0607075	0.0805225	0.0512755	-0.147332	0.0626335	0.195825	-0.0141165	-0.0618085	-0.184169	-0.0057125	-1.11692	-0.973517
	11	chr17_41243706_41243971	0.438373	0.502212	0.411948	0.50229	0.412479	0.461331	0.464373	0.405457	0.441222	0.364699	0.473107	0.318985	0.405914	0.38049	-0.544205	-0.534592	0.412214	0.0261595	0.0899985	-0.0002655	0.0900765	0.0002655	0.0491175	0.0521595	-0.0067565	0.0290085	-0.0475145	0.0608935	-0.0932285	-0.0062995	-0.0317235	-0.956419	-0.946805
	11	chr17_41243441_41243706	0.296217	0.415013	0.471222	0.414294	0.215648	0.300904	0.564394	0.315414	0.419397	0.551241	0.406996	0.363899	0.396167	0.434407	-0.637073	-0.475049	0.401582	-0.105365	0.0134315	0.0696405	0.0127125	-0.185934	-0.100678	0.162812	-0.0861675	0.0178155	0.149659	0.0054145	-0.0376825	-0.0054145	0.0328255	-1.03865	-0.876631
	12	chr17_41242950_41243059	0.00401163	-0.129148	-0.335815	-0.292064	-0.401892	-0.382611	-0.397262	-0.176612	-0.316942	-0.210115	-0.14753	-0.214603	-0.18817	-0.122663	-1.46516	-1.13899	-0.253333	0.257345	0.124185	-0.0824815	-0.0387305	-0.148559	-0.129277	-0.143929	0.0767215	-0.0636085	0.0432185	0.105803	0.0387305	0.0651635	0.13067	-1.21183	-0.885656
	13	chr17_41234410_41234602	0.288312	0.0567713	0.234141	-0.114732	0.109059	0.0515571	-0.0330091	0.661232	0.187705	0.193613	0.0932617	-0.252006	-0.0879235	-0.111484	-0.895896	-0.912209	0.0541642	0.234148	0.0026071	0.179977	-0.168896	0.0548948	-0.0026071	-0.0871733	0.607068	0.133541	0.139449	0.0390975	-0.30617	-0.142088	-0.165648	-0.95006	-0.966373
	14	chr17_41228494_41228641	0.263334	0.159034	0.137718	0.212015	0.226339	0.105314	0.142985	0.0496011	0.161243	0.208421	0.0395775	0.299193	0.124931	0.0248528	-0.733226	-0.822609	0.140352	0.122982	0.0186825	-0.0026335	0.0716635	0.0859875	-0.0350375	0.0026335	-0.0907504	0.0208915	0.0680695	-0.100774	0.158841	-0.0154205	-0.115499	-0.873578	-0.962961
	15	chr17_41226337_41226548	-0.0582833	0.0302806	-0.0363841	0.120978	0.1367	0.111675	0.0407162	0.0633655	0.0509644	0.271754	-0.141942	-0.196169	0.000892162	0.196197	-0.733461	0.0669432	0.0458403	-0.104124	-0.0155597	-0.0822244	0.0751377	0.0908597	0.0658347	-0.0051241	0.0175252	0.0051241	0.225914	-0.187782	-0.242009	-0.0449481	0.150357	-0.779301	0.0211029
	16	chr17_41222934_41223265	0.00103235	0.0797725	0.0751181	0.184359	0.315046	0.293002	0.322086	0.338554	0.180251	0.160963	0.22882	0.0796485	0.16527	0.214572	-0.716316	0.292759	0.182305	-0.181273	-0.102532	-0.107187	0.002054	0.132741	0.110697	0.139781	0.156249	-0.002054	-0.021342	0.046515	-0.102656	-0.017035	0.032267	-0.898621	0.110454
	17	chr17_41219614_41219722	-0.251609	-0.149745	-0.237955	-0.0820646	-0.132069	-0.176384	-0.178124	0.0140729	-0.0270042	-0.423874	0.0348926	-0.0596085	-0.0882325	0.0495548	-1.6025	-0.0363541	-0.110151	-0.141458	-0.0395942	-0.127804	0.0280861	-0.0219183	-0.0662333	-0.0679733	0.124224	0.0831465	-0.313723	0.145043	0.0505422	0.0219182	0.159706	-1.49235	0.0737966
	18	chr17_41215879_41215979	-0.00727987	-0.0289683	0.119439	0.073525	-0.010148	0.0454865	-0.0647836	-0.0985732	-0.117129	-0.929171	0.0395398	0.0568552	0.148505	0.0344181	0.0709748	0.0269637	0.0306909	-0.0379708	-0.0596592	0.0887481	0.0428341	-0.0408389	0.0147956	-0.0954745	-0.129264	-0.14782	-0.959862	0.0088489	0.0261643	0.117814	0.0037272	0.0402839	-0.0037272
	19	chr17_41215320_41215420	-0.0279999	-0.195449	0.0060792	-0.145434	-0.115005	-0.0351744	-0.103538	-0.0290999	-0.0703778	-1.39196	-0.114453	-0.0676546	-0.049386	-0.373992	0.0529428	-0.110888	-0.0869579	0.058958	-0.108491	0.0930371	-0.0584761	-0.0280471	0.0517835	-0.0165801	0.057858	0.0165801	-1.305	-0.0274951	0.0193033	0.0375719	-0.287034	0.139901	-0.0239301
	20	chr17_41209058_41209162	-0.105892	-0.188218	-0.198669	0.0625763	-0.0216007	-0.173887	-0.16487	0.183445	0.0822606	-0.958386	-0.0226989	0.00333309	0.218457	-1.11286	0.0627036	-0.0302653	-0.0264821	-0.0794099	-0.161736	-0.172187	0.0890584	0.0048814	-0.147405	-0.138388	0.209927	0.108743	-0.931904	0.0037832	0.0298152	0.244939	-1.08638	0.0891857	-0.0037832
	21	chr17_41203057_41203157	-0.147455	-0.0937452	-0.209746	0.0214043	-0.21391	-0.364882	-0.065443	0.0641069	-0.216204	-0.937881	0.0130038	-0.230348	-1.07946	-0.214099	-0.0385041	-0.167046	-0.188396	0.040941	0.0946508	-0.02135	0.2098	-0.025514	-0.176486	0.122953	0.252503	-0.027808	-0.749485	0.2014	-0.041952	-0.891064	-0.025703	0.149892	0.02135
	22	chr17_41201124_41201224	-0.146077	-0.183649	0.119816	0.00906897	-0.109184	0.0113063	-0.0506778	-0.315794	-0.21979	-1.32812	-0.250395	-0.247131	-1.0102	-0.137933	0.0130825	0.0830159	-0.142005	-0.004072	-0.041644	0.261821	0.151074	0.032821	0.153311	0.0913272	-0.173789	-0.077785	-1.18612	-0.10839	-0.105126	-0.868195	0.004072	0.155087	0.225021
	23	chr17_41199640_41199740	0.0666862	-0.0128708	-0.180935	-0.148502	-0.16361	-0.156895	-0.231087	-0.136285	-0.239408	-0.310528	-0.200442	-0.208554	0.124872	-0.139739	-0.266681	-0.0411954	-0.160253	0.226939	0.147382	-0.0206825	0.0117505	-0.0033575	0.0033575	-0.0708345	0.0239675	-0.0791555	-0.150276	-0.0401895	-0.0483015	0.285125	0.0205135	-0.106428	0.119057
	24	chr17_41197686_41197829	-0.236229	-0.176545	-0.307604	-0.383316	-0.335335	-0.428329	-0.269624	-0.443164	-0.264881	-0.425195	-0.369324	-0.635918	-0.202008	-0.163375	-0.371532	-0.293523	-0.321469	0.0852405	0.144924	0.0138655	-0.0618465	-0.0138655	-0.10686	0.0518455	-0.121695	0.0565885	-0.103726	-0.0478545	-0.314449	0.119461	0.158094	-0.0500625	0.0279465
PALB2
Sample numbers:			1647	1507	2931	79	2505	2506	2508	2511	2512	2525	2556	2618	1550	1804	1820			1647	1507	2931	79	2505	2506	2508	2511	2512	2525	2556	2618	1550	1804	1820
	1	chr16_23652420_23652688	-0.858326	-0.7911	-0.985661	-0.963158	-0.851746	-1.00851	-1.04992	-0.863687	-0.765299	-0.956742	-1.13682	-0.929943	-0.916633	-0.902315	-0.675506		-0.916633	0.058307	0.125533	-0.069028	-0.046525	0.064887	-0.091877	-0.133287	0.052946	0.151334	-0.040109	-0.220187	-0.01331	0	0.014318	0.241127
	2	chr16_23649370_23649470	0.11818	0.131306	0.156374	0.174639	-0.09443	-0.0118141	-0.206656	-0.237187	0.115119	-0.100985	0.0893869	0.0195608	-0.205749	0.0364857	0.00793505		0.0195608	0.0986192	0.111745	0.136813	0.155078	-0.113991	-0.0313749	-0.226217	-0.256748	0.0955582	-0.120546	0.0698261	0	-0.22531	0.0169249	-0.0116257
	3	chr16_23649160_23649283	0.224532	0.198073	0.176886	0.1165	0.0621738	0.0888867	0.0234303	0.205173	0.0985537	0.213006	0.156561	0.186608	0.00397539	0.130532	0.355955		0.156561	0.067971	0.041512	0.020325	-0.040061	-0.0943872	-0.0676743	-0.133131	0.048612	-0.0580073	0.056445	0	0.030047	-0.152586	-0.026029	0.199394
	4	chr16_23647416_23647664	0.0238471	0.107151	0.125532	0.0556388	0.0491123	0.172341	0.063992	-0.0601034	0.111954	0.0988016	0.215777	0.0761194	0.0861187	0.170598	0.105096		0.0988016	-0.0749545	0.0083494	0.0267304	-0.0431628	-0.0496893	0.0735394	-0.0348096	-0.158905	0.0131524	0	0.116975	-0.0226822	-0.0126829	0.0717964	0.0062944
	4	chr16_23647167_23647416	0.29467	0.287655	0.516322	0.24716	0.297889	0.298462	0.334212	0.255202	0.328372	0.323768	0.538252	0.324232	0.322097	0.439746	0.205201		0.322097	-0.027427	-0.034442	0.194225	-0.074937	-0.024208	-0.023635	0.012115	-0.066895	0.006275	0.001671	0.216155	0.002135	0	0.117649	-0.116896
	4	chr16_23646918_23647167	0.34471	0.298358	0.552644	0.350906	0.439575	0.307773	0.244527	0.25085	0.331896	0.32909	0.5209	0.387786	0.305427	0.505352	0.319933		0.331896	0.012814	-0.033538	0.220748	0.01901	0.107679	-0.024123	-0.087369	-0.081046	0	-0.002806	0.189004	0.05589	-0.026469	0.173456	-0.011963
	4	chr16_23646669_23646918	0.402804	0.374455	0.500155	0.198406	0.421594	0.233321	0.170948	0.413049	0.230072	0.310807	0.467193	0.379442	0.336299	0.57816	0.411664		0.379442	0.023362	-0.004987	0.120713	-0.181036	0.042152	-0.146121	-0.208494	0.033607	-0.14937	-0.068635	0.087751	0	-0.043143	0.198718	0.032222
	4	chr16_23646420_23646669	0.302489	0.353229	0.439185	0.217432	0.325269	0.362488	0.263474	0.325583	0.287835	0.144534	0.328905	0.246113	0.36521	0.325074	0.274981		0.325074	-0.022585	0.028155	0.114111	-0.107642	0.000195	0.037414	-0.0616	0.000509	-0.037239	-0.18054	0.003831	-0.078961	0.040136	0	-0.050093
	4	chr16_23646172_23646420	0.101234	0.222519	0.267119	0.12108	0.126111	0.261459	0.0307884	0.133278	0.296769	0.0533524	0.316541	0.0101137	0.290386	0.216681	0.22019		0.216681	-0.115447	0.005838	0.050438	-0.095601	-0.09057	0.044778	-0.185893	-0.083403	0.080088	-0.163329	0.09986	-0.206567	0.073705	0	0.003509
	5	chr16_23641516_23641799	0.392121	0.260603	0.434929	0.310118	0.190656	0.216407	0.296289	0.272913	0.369184	0.160856	0.214559	0.189832	0.376729	0.264853	0.455374		0.272913	0.119208	-0.01231	0.162016	0.037205	-0.082257	-0.056506	0.023376	0	0.096271	-0.112057	-0.058354	-0.083081	0.103816	-0.00806	0.182461
	5	chr16_23641233_23641516	0.335456	0.377245	0.366014	0.234882	0.340911	0.290669	0.354486	0.216474	0.369845	0.359974	0.347455	0.31854	0.31657	0.27355	0.319911		0.335456	0	0.041789	0.030558	-0.100574	0.005455	-0.044787	0.01903	-0.118982	0.034389	0.024518	0.011999	-0.016916	-0.018886	-0.061906	-0.015545
	5	chr16_23640950_23641233	0.270339	0.331904	0.276763	0.210436	0.183612	0.344032	0.214363	0.0865946	0.110765	0.279541	0.169286	0.31424	0.361497	0.159546	0.159636		0.214363	0.055976	0.117541	0.0624	-0.003927	-0.030751	0.129669	0	-0.127768	-0.103598	0.065178	-0.045077	0.099877	0.147134	-0.054817	-0.054727
	6	chr16_23640510_23640610	-0.0667081	-0.00629663	-0.0325575	-0.288141	-0.0699887	0.0990381	-0.103275	0.00717354	-0.149869	-0.224421	-0.325595	0.037199	0.131854	-0.213068	-0.106369		-0.0699887	0.0032806	0.0636921	0.0374312	-0.218152	0	0.169027	-0.0332863	0.0771622	-0.0798803	-0.154432	-0.255606	0.107188	0.201843	-0.143079	-0.0363803
	7	chr16_23637546_23637728	-0.958005	0.170352	-0.741645	0.20433	0.139822	0.37629	0.135275	0.118054	0.161157	0.413969	0.218461	0.221611	0.364676	0.109958	0.37427		0.170352	-1.12836	0	-0.911997	0.033978	-0.03053	0.205938	-0.035077	-0.052298	-0.009195	0.243617	0.048109	0.051259	0.194324	-0.060394	0.203918
	8	chr16_23635319_23635425	-0.554885	0.2723	-0.589961	0.101216	0.0528936	0.203641	0.146294	0.212315	0.188087	0.251799	0.388388	0.314597	0.252588	0.328987	0.287853		0.212315	-0.7672	0.059985	-0.802276	-0.111099	-0.159421	-0.008674	-0.066021	0	-0.024228	0.039484	0.176073	0.102282	0.040273	0.116672	0.075538
	9	chr16_23634279_23634461	-0.00337029	-0.996583	-0.11384	0.536262	0.00998497	-0.0583663	0.0992584	0.104228	-0.0182581	-0.0361362	0.0667858	0.0271821	-0.0408735	0.00525331	0.0458403		0.00525331	-0.0086236	-1.00184	-0.119093	0.531009	0.00473166	-0.0636196	0.0940051	0.0989747	-0.0235114	-0.0413895	0.0615325	0.0219288	-0.0461268	0	0.040587
	10	chr16_23632672_23632809	-0.212285	-0.757878	-0.030973	0.522907	-0.22346	-0.153383	-0.207046	-0.147519	-0.262303	-0.0874486	0.112987	-0.0569172	0.0108528	-0.0948324	0.0361309		-0.0948324	-0.117453	-0.663046	0.0638594	0.617739	-0.128628	-0.0585506	-0.112214	-0.0526866	-0.167471	0.0073838	0.207819	0.0379152	0.105685	0	0.130963
	11	chr16_23625314_23625422	-0.0203934	0.0463843	0.216005	0.555893	0.149119	-0.0280328	0.195483	0.13013	-0.093605	0.118572	-0.336075	-0.0872226	-0.0518017	0.326987	0.0618262		0.0618262	-0.0822196	-0.0154419	0.154179	0.494067	0.0872928	-0.089859	0.133657	0.0683038	-0.155431	0.0567458	-0.397901	-0.149049	-0.113628	0.265161	0
	12	chr16_23619174_23619343	-0.0817051	-0.0343781	-0.215127	-0.137976	0.0895128	-0.112591	-0.0845013	-0.193975	-0.124445	-0.209666	0.108206	-0.0884275	-0.0551682	0.0362859	-0.07584		-0.0845013	0.0027962	0.0501232	-0.130626	-0.0534747	0.174014	-0.0280897	0	-0.109474	-0.0399437	-0.125165	0.192707	-0.0039262	0.0293331	0.120787	0.0086613
	13	chr16_23614736_23615000	0.227082	0.08356	0.292364	0.146406	0.244866	0.0453701	0.230736	0.212412	0.179027	0.353512	0.0839071	0.127567	0.139891	0.173293	0.151746		0.173293	0.053789	-0.089733	0.119071	-0.026887	0.071573	-0.127923	0.057443	0.039119	0.005734	0.180219	-0.0893859	-0.045726	-0.033402	0	-0.021547
	13	chr16_23614472_23614736	0.225081	0.259607	0.470067	0.257229	0.0424414	0.179899	0.163867	0.168615	-0.016119	0.237807	0.148845	0.175589	0.119546	0.231239	0.225238		0.179899	0.045182	0.079708	0.290168	0.07733	-0.137458	0	-0.016032	-0.011284	-0.196018	0.057908	-0.031054	-0.00431	-0.060353	0.05134	0.045339
CHEK2
Sample numbers:			1328	3152	3246	2516	2861	3011	3215	3216	3241	3242	3243	3244	3245					1328	3152	3246	2516	2861	3011	3215	3216	3241	3242	3243	3244	3245
	1	chr22_29137739_29137839	-0.841565	-0.552722	-0.85213	-0.783778	-0.626611	-0.564552	-0.583635	-0.651568	-0.641745	-0.682083	-0.682465	-0.652987	-0.799637				-0.652987	-0.188578	0.100265	-0.199143	-0.130791	0.026376	0.088435	0.069352	0.001419	0.011242	-0.029096	-0.029478	0	-0.14665
	2	chr22_29130380_29130725	-0.158809	-0.0719714	0.0581384	-0.0378265	0.0237322	-0.239618	-0.0927296	0.076221	-0.0666828	0.0196724	-0.10533	-0.0300303	0.16069				-0.0378265	-0.120983	-0.0341449	0.0959649	0	0.0615587	-0.201792	-0.0549031	0.114047	-0.0288563	0.0574989	-0.0675035	0.0077962	0.198516
	3	chr22_29121220_29121365	0.309275	0.326504	0.305209	0.40279	0.326423	0.203806	0.202084	0.0894446	0.288559	0.291819	0.302681	0.331517	0.340436				0.305209	0.004066	0.021295	0	0.097581	0.021214	-0.101403	-0.103125	-0.215764	-0.01665	-0.01339	-0.002528	0.026308	0.035227
	4	chr22_29120954_29121122	0.401413	0.299785	0.195027	0.38256	0.31157	0.214228	0.36498	0.354497	0.341697	0.418477	0.217443	0.109921	0.315058				0.315058	0.086355	-0.015273	-0.120031	0.067502	-0.003488	-0.10083	0.049922	0.039439	0.026639	0.103419	-0.097615	-0.205137	0
	alt5	chr22_29117495_29117629	-1.70503	-1.88753	-1.82388	-2.16993	-1.64149	-2.05933	-2.13722	-1.99797	-1.72117	-1.40035	-1.74539	-2.25241	-1.91139				-1.88753	0.1825	0	0.06365	-0.2824	0.24604	-0.1718	-0.24969	-0.11044	0.16636	0.48718	0.14214	-0.36488	-0.02386
	5	chr22_29115372_29115483	-0.256159	-0.68855	-0.0859122	-0.593166	-0.190427	-0.581451	-0.394288	-0.355343	-0.360124	-0.400898	-0.652215	-0.346598	-0.043149				-0.360124	0.103965	-0.328426	0.274212	-0.233042	0.169697	-0.221327	-0.034164	0.004781	0	-0.040774	-0.292091	0.013526	0.316975
	6	chr22_29107886_29108015	0.234548	0.0179186	0.0811205	0.189855	0.0831952	0.18492	0.0868979	-0.219198	0.114201	-0.0742574	0.226165	0.23392	-0.0620465				0.0868979	0.14765	-0.0689793	-0.0057774	0.102957	-0.0037027	0.0980221	0	-0.306096	0.0273031	-0.161155	0.139267	0.147022	-0.148944
	7	chr22_29105970_29106070	0.0119729	-0.379153	0.100197	-0.464911	-0.0849295	-0.114707	-0.320926	-0.204783	-0.373555	-0.392315	-0.158201	-0.22029	-0.422685				-0.22029	0.232263	-0.158863	0.320487	-0.244621	0.13536	0.105583	-0.100636	0.015507	-0.153265	-0.172025	0.062089	0	-0.202395
	8	chr22_29099473_29099573	-0.992874	-0.249585	-0.121206	-0.170768	-0.00517607	-0.287753	-0.123779	-0.312819	-0.0690064	-0.0173931	-0.0343294	-0.170981	-0.180979				-0.170768	-0.822106	-0.078817	0.049562	0	0.165592	-0.116985	0.046989	-0.142051	0.101762	0.153375	0.136439	-0.000213	-0.010211
	9	chr22_29095815_29095935	-0.235933	-0.832918	-0.246318	-0.0188346	-0.324655	-0.197997	-0.243625	-0.153656	-0.293619	-0.0638084	-0.197423	-0.187231	-0.0931554				-0.197997	-0.037936	-0.634921	-0.048321	0.179162	-0.126658	0	-0.045628	0.044341	-0.095622	0.134189	0.000574	0.010766	0.104842
	10	chr22_29092878_29092985	0.000237942	-1.04724	-0.0337238	-0.0901451	-0.0691357	0.0684419	0.135437	-0.0127378	0.10108	0.0476637	0.277467	0.0873713	0.261269				0.0476637	-0.0474258	-1.0949	-0.0813875	-0.137809	-0.116799	0.0207782	0.0877733	-0.0604015	0.0534163	0	0.229803	0.0397076	0.213605
	11	chr22_29091687_29091871	-0.855343	-1.04813	-1.62934	-0.906269	-1.02512	-1.34145	-1.29463	-0.879266	-1.45618	-0.924242	-0.985057	-0.961834	-1.54789				-1.02512	0.169777	-0.02301	-0.60422	0.118851	0	-0.31633	-0.26951	0.145854	-0.43106	0.100878	0.040063	0.063286	-0.52277
TP53
Sample numbers:			1920	2516	2861	3011	3215	3216	3241	3242	3243	3244	3245	3246						1920	2516	2861	3011	3215	3216	3241	3242	3243	3244	3245	3246
	1	chr17_7590684_7590878	-0.098073	-0.454554	-0.413961	-0.0766072	-0.256999	-0.463144	-0.464257	-0.197582	-0.148513	-0.453252	-0.130275	-0.493888					-0.33548	0.237407	-0.119074	-0.078481	0.258873	0.078481	-0.127664	-0.128777	0.137898	0.186967	-0.117772	0.205205	-0.158408
	2-3	chr17_7579689_7579950	-0.32499	-0.548006	-0.609297	-0.631246	-0.498512	-0.646469	-0.759976	-0.524183	-0.481442	-0.514736	-0.516451	-0.521493					-0.522838	0.197848	-0.025168	-0.086459	-0.108408	0.024326	-0.123631	-0.237138	-0.001345	0.041396	0.008102	0.006387	0.001345
	4	chr17_7579301_7579600	-0.167686	-0.485462	-0.413166	-0.255074	-0.316582	-0.286253	-0.478395	-0.427166	-0.500269	-0.354253	-0.409713	-0.221478					-0.381983	0.214297	-0.103479	-0.031183	0.126909	0.065401	0.09573	-0.096412	-0.045183	-0.118286	0.02773	-0.02773	0.160505
	5	chr17_7578590_7578821	-0.850414	-0.644852	-0.58018	-0.803701	-0.927527	-0.863196	-1.05217	-0.824884	-1.10382	-0.565928	-0.459454	-0.855571					-0.837649	-0.012765	0.192797	0.257469	0.033948	-0.089878	-0.025547	-0.214521	0.012765	-0.266171	0.271721	0.378195	-0.017922
	5	chr17_7578360_7578590	-0.0371485	-0.140746	-0.110591	-0.272408	-0.433583	0.090766	-0.0526605	-0.261883	-0.209593	0.0350709	-0.108733	-0.036736					-0.109662	0.0725135	-0.031084	-0.000929	-0.162746	-0.323921	0.200428	0.0570015	-0.152221	-0.099931	0.144733	0.000929	0.072926
	6	chr17_7578166_7578299	-0.679343	-0.204908	-0.0958686	-0.0868182	-0.370605	-0.0290189	-0.266438	-0.141357	-0.142441	-0.300288	-0.337384	-0.0750055					-0.173675	-0.505669	-0.0312335	0.0778059	0.0868563	-0.196931	0.144656	-0.0927635	0.0323175	0.0312335	-0.126613	-0.16371	0.098669
	7	chr17_7577488_7577618	-0.551228	-0.516559	-0.217431	-0.45393	-0.380378	-0.592899	-0.32282	-0.347889	-0.253022	-0.28284	-0.380696	-0.600705					-0.380537	-0.170691	-0.136022	0.163106	-0.073393	0.000159	-0.212362	0.057717	0.032648	0.127515	0.097697	-0.000159	-0.220168
	8	chr17_7577008_7577165	-0.0309162	-0.584613	-0.351329	-0.170818	-0.18088	-0.169508	-0.210062	-0.171492	-0.262542	-0.104326	-0.345168	-0.257934					-0.195471	0.164555	-0.389142	-0.155858	0.024653	0.014591	0.025963	-0.014591	0.023979	-0.067071	0.091145	-0.149697	-0.062463
	9	chr17_7576839_7576939	0.195919	0.062964	0.0739665	0.190348	0.124399	-0.0526576	0.0377512	0.0960445	-0.0305905	0.039969	0.0199251	-0.00536966					0.0514665	0.144453	0.0114975	0.0225	0.138881	0.0729325	-0.104124	-0.0137153	0.044578	-0.082057	-0.0114975	-0.0315414	-0.0568362
	9	chr17_7576514_7576667	0.131139	0.212393	-0.126424	0.0225768	-0.174835	0.0563917	-0.0619597	-0.339784	0.030417	-0.172623	-0.309051	0.0674067					-0.0196914	0.15083	0.232084	-0.106733	0.0422683	-0.155144	0.0760832	-0.0422683	-0.320093	0.0501084	-0.152932	-0.28936	0.0870981
	10	chr17_7573916_7574043	-1.45678	-0.807282	-0.38342	-0.784532	-0.87326	-0.633514	-0.211861	-0.689291	-0.433273	-0.380669	-0.549466	-0.275933					-0.59149	-0.86529	-0.215792	0.20807	-0.193042	-0.28177	-0.042024	0.379629	-0.097801	0.158217	0.210821	0.042024	0.315557
	11	chr17_7572908_7573018	-1.74956	-0.410013	-0.164614	-0.106759	-0.0938921	-0.144855	-0.319139	-0.646769	-0.283487	-0.565691	-0.456843	-0.280751					-0.301313	-1.44825	-0.1087	0.136699	0.194554	0.207421	0.156458	-0.017826	-0.345456	0.017826	-0.264378	-0.15553	0.020562
